# Supplementary material for: Psychometric Properties of the Clinical Dementia Rating Scale Sum of Boxes in Parkinson’s Disease
Source: PubMed Central journal article supplement (PMC8058172; doi:10.3233/jpd-202390), 2021-04-13
Supplement: NIHMS1657282-supplement-1.pdf [file NIHMS1657282-supplement-1.pdf]

**Supplementary Table 1: Longitudinal cohort CDR-SOB scores by cognitive diagnosis**

| Group                | Baseline |           |              |       |                                | Follow-up |           |              |       |                                |
|----------------------|----------|-----------|--------------|-------|--------------------------------|-----------|-----------|--------------|-------|--------------------------------|
|                      | N        | Mean      | Median (IQR) | Range | Wilcoxon-Mann-Whitney p value* | N         | Mean      | Median (IQR) | Range | Wilcoxon-Mann-Whitney p value* |
| Total                | 64       | 2.0 (2.5) | 1 (0.5-2.5)  | 13    |                                | 51        | 2.4 (3.7) | 1 (0.5-2.5)  | 17    |                                |
| Normal Cognition     | 32       | 0.8 (0.9) | 0.5 (0-1.4)  | 3.5   | 0.001                          | 24        | 0.8 (0.9) | 0.5 (0-1.4)  | 3.5   | <0.001                         |
| Cognitive Impairment | 32       | 3.2 (3.0) | 2.0 (1-4)    | 12.5  |                                | 27        | 3.8 (4.6) | 2.0 (1-4.5)  | 16.5  |                                |

\* Comparison between normal cognition and cognitive impairment groups

**Supplementary Table 2. Annual change in CDR-SOB and domain scores by cognitive subgroup at baseline**

| Test              | Normal cognition | Cognitive impairment | Difference | Standard Error | t     | df   | p value for annual change |
|-------------------|------------------|----------------------|------------|----------------|-------|------|---------------------------|
| CDR-SOB           | -0.01            | 0.17                 | -0.18      | 0.23           | -0.80 | 62.8 | 0.43                      |
| Memory            | 0.02             | 0.02                 | 0.002      | 0.06           | 0.04  | 63.3 | 0.97                      |
| Orientation       | -0.04            | 0.04                 | -0.08      | 0.05           | -1.42 | 63.5 | 0.16                      |
| Judgment          | 0.01             | -0.02                | 0.03       | 0.05           | 0.47  | 63.6 | 0.64                      |
| Community Affairs | -0.01            | 0.01                 | -0.02      | 0.04           | -0.42 | 62.9 | 0.68                      |
| Home & Hobbies    | 0.01             | 0.04                 | -0.03      | 0.06           | -0.54 | 63.3 | 0.59                      |
| Personal Care     | -0.001           | 0.08                 | -0.09      | 0.06           | -1.36 | 63.5 | 0.18                      |

**Supplementary Table 3: Annual change in reference cognitive and functional measures in longitudinal cohort**

| Test    | Estimate | Standard Error | t     | df    | p value for annual change |
|---------|----------|----------------|-------|-------|---------------------------|
| DRS-2   | -2.26    | 0.61           | -3.68 | 64.63 | <0.001                    |
| MoCA    | -0.62    | 0.22           | -2.86 | 64.24 | 0.006                     |
| ADLI    | -0.93    | 0.48           | -1.94 | 62.62 | 0.06                      |
| PDAQ-15 | -1.32    | 0.59           | -2.26 | 63.88 | 0.03                      |

**Supplementary Table 4: Association between change in CDR-SOB and changes in cognitive and functional measures in longitudinal cohort**

| Test    | Estimate | Standard Error | t     | df   | p value for annual change |
|---------|----------|----------------|-------|------|---------------------------|
| DRS-2   | -1.25    | 1.80           | -0.69 | 84.4 | 0.49                      |
| MoCA    | -1.43    | 0.60           | -2.37 | 75.0 | 0.02                      |
| ADLI    | -4.60    | 1.35           | -3.41 | 69.5 | 0.001                     |
| PDAQ-15 | 1.57     | 1.91           | 0.83  | 72.0 | 0.41                      |
